1 **Bumblebees measure optic flow for position and speed control flexibly within the frontal**  
2 **visual field**

3

4 Nellie Linander\*, Marie Dacke and Emily Baird

5

6 Lund Vision Group, Department of Biology, Lund University, Sweden

7 \*corresponding author: [nellie.linander@biol.lu.se](mailto:nellie.linander@biol.lu.se)

8

## ABSTRACT

9

10 When flying through narrow spaces, insects control their position by balancing the magnitude  
11 of apparent image motion (optic flow) experienced in each eye and their speed by holding this  
12 value about a desired set-point. Previously, it has been shown that when bumblebees  
13 encounter sudden changes in the proximity to nearby surfaces – as indicated by a change in  
14 the magnitude of optic flow on each side of the visual field – they adjust their flight speed  
15 well before the change, suggesting that they measure optic flow for speed control at low  
16 visual angles in the frontal visual field. Here, we investigate the effect that sudden changes in  
17 the magnitude of translational optic flow have on both position and speed control in  
18 bumblebees if these changes are asymmetrical, that is, if they occur only on one side of the  
19 visual field. Our results reveal that the visual region over which bumblebees respond to optic  
20 flow cues for flight control is not dictated by a set viewing angle. Instead, they appear to use  
21 the maximum magnitude of translational optic flow experienced in the frontal visual field.  
22 This strategy ensures that bumblebees use the translational optic flow generated by the nearest  
23 obstacles – that is, those with which they have the highest risk of colliding – to control flight.

24

25 **Keywords:** bumblebee, flight control, optic flow, position, flight speed, viewing angle

26

27

28  
29  
30  
31  
32  
33  
34  
35  
36  
37  
38  
39  
40  
41  
42  
43  
44  
45  
46  
47  
48  
49  
50  
51  
52  
53  
54  
55  
56  
57  
58  
59  
60  
61

## INTRODUCTION

When an animal moves through the environment, the image of the world moves across its retina, creating a pattern of apparent image motion known as optic flow (Gibson, 1950; Gibson, 1979). During forward motion, translational optic flow (the term ‘translational optic flow’ in this context refers to image motion along the animal’s longitudinal axis) varies inversely with the distance to nearby surfaces so that closer objects appear to move faster than those that are further away. Thus, translational optic flow provides important information about an animal’s self motion and the spatial layout of the environment (Collett, 2002; Koenderink, 1986; Lappe, 2000). Flying insects use this information to control various aspects of their flight. When flying through narrow spaces, honeybees and bumblebees use translational optic flow to control their position so as to maintain an equal distance to the nearby surfaces – a behaviour known as *centring*. It has been proposed that this centring behaviour is achieved by balancing the magnitude of the lateral optic flow experienced in each eye (Dyhr and Higgins, 2010; Kirchner and Srinivasan, 1989; Srinivasan et al., 1991; Srinivasan et al., 1996) or by maintaining the magnitude of unilateral optic flow about a set-point (Serres et al., 2008a, 2008b). Translational optic flow cues are also used by honeybees (Portelli et al., 2011, Baird et al., 2005; Barron and Srinivasan, 2006; Srinivasan et al., 1996), bumblebees (Baird et al., 2010) and *Drosophila* (David, 1982; Fry et al., 2009) to control their ground speed. By holding the magnitude of translational optic flow about a set-point, these insects ensure that their speed automatically decreases as the distance to nearby obstacles (and therefore the risk of collision) decreases. Thus, by utilising information contained in the translational optic flow field, insects have developed computationally simple strategies for solving the rather complex problem of controlling flight and avoiding collisions with nearby obstacles.

Although we now understand quite a lot about how insects use translational optic flow cues for position and speed control, one thing that remains unclear is how they use this information to detect and respond to *changes* in the proximity of the environment, such as those which might occur when flying from a cluttered forest into an open field. The key lies in understanding where in the visual field translational optic flow for flight control is being measured. For an insect that is flying at a constant forward speed, the magnitude of translational optic flow is not constant over the entire visual field. Instead, it is greatest at an angle of 90 deg. from the direction of motion and decreases to a value of zero in the direction of flight (in pure forward translation, this would be aligned with the midline of the insect and

62 its visual field) (Gibson, 1950). This means that the relative difference in the magnitude of  
63 translational optic flow experienced by an insect approaching a change in the proximity of the  
64 environment would be larger, and presumably easier to detect, in more lateral regions of the  
65 visual field (assuming that the eyes are aligned with the direction of flight). However, the  
66 larger the angle at which these changes are detected, the less time an insect will have to adjust  
67 its flight before encountering the change. Thus, the viewing angle at which optic flow is  
68 measured has important consequences for flight in densely cluttered environments, where  
69 timely control of position and speed are necessary for effective collision avoidance.

70 In one of the first attempts to identify where in the visual field optic flow is measured for  
71 flight control, Srinivasan et al., (1991) investigated how honeybees adjust their position in  
72 response to a black bar presented in an otherwise featureless flight tunnel. The bees deflected  
73 away from the bar only once they had flown past it, suggesting that they were measuring optic  
74 flow for position control in the lateral region of the visual field. This was consistent with the  
75 findings of an earlier study which showed that, to locate a frontally positioned target,  
76 honeybees use image motion generated by landmarks in the lateral visual field (Lehrer, 1990).  
77 In contrast to these earlier findings, however, more recent studies on honeybees (Portelli et al.,  
78 2010), blowflies (Kern et al., 2012) and bumblebees (Baird et al., 2010) suggest that these  
79 insects also respond to changes in optic flow that occur in the more frontal region of the  
80 visual field. In the latter study, aimed at defining the minimum viewing angle at which  
81 bumblebees measure translational optic flow for ground speed control, the changes in  
82 translational optic flow were laterally symmetric, meaning that the same change occurred in  
83 both the left and the right visual fields at the same time. What remains unclear, however, is  
84 how position and speed control is affected when bumblebees experience a sudden change in  
85 optic flow that occurs on only one side of the visual field, that is, when it becomes  
86 asymmetric. Are bumblebees also able to detect and respond to these unilateral changes in the  
87 proximity of the environment at low viewing angles? If so, how and when do they react to  
88 these changes? Here, we aim to answer these questions by presenting bumblebees with abrupt  
89 unilateral changes in translational optic flow – generated by flight past stationary patterns  
90 whose visual properties change abruptly – and record the effect on position and flight speed.

91  
92  
93  
94  
95

## RESULTS

### The effect of asymmetric translational optic flow cues on flight control

#### *The centring response*

When both walls of the 3 m long flight tunnel (Fig. 1) were lined with checkerboard patterns ( $S_{checks}$ ), providing laterally symmetric translational optic flow cues (indicated by the letter S in the abbreviation  $S_{checks}$ ), the flight paths in both the 30 cm and 15 cm wide tunnels were relatively straight (Fig. 2A). The low values for the mean lateral distance from the midline in both the 30 cm wide tunnel,  $0.04 \pm 1.18$  cm (mean  $\pm$  s.d.), and the 15 cm wide tunnel,  $0.14 \pm 0.21$  cm, indicate that the bumblebees centred accurately between the two walls (Fig. 2). When the lateral translational optic flow in the tunnel was asymmetric (indicated by the letter A in abbreviations below), with horizontal stripes (providing only weak translational optic flow cues) on one wall and checks (providing strong translational optic flow cues) on the other, the trajectories were still relatively straight but they were shifted towards the striped wall ( $P < 0.001$ ; for details of this and all statistical analyses shown below, see Table 1) with mean lateral positions of  $10.42 \pm 0.47$  cm and  $4.19 \pm 0.38$  cm from the midline in the 30 cm and 15 cm wide tunnels, respectively (Fig. 2). When both walls were lined with stripes ( $S_{stripes}$ ), providing laterally symmetric translational optic flow cues (indicated by the letter S in the abbreviation  $S_{stripes}$ ), the flight trajectories were more widely distributed across the tunnel ( $-4.49 \pm 2.38$  cm and  $-0.56 \pm 0.57$  cm from the midline in the 30 cm and 15 cm wide tunnels, respectively). Some bees even flew from wall to wall, suggesting that they were no longer able to control their position (Fig. 2A).

#### *Flight speed*

When the translational optic flow cues were laterally symmetric – checks on both walls ( $S_{checks}$ ) – flight speed was significantly slower (30 cm:  $68.3 \pm 13.0$  cm/s; 15 cm:  $49.6 \pm 11.3$  cm/s) than when these cues were asymmetric – checks on one wall and stripes on the other (A) (30 cm:  $82.4 \pm 15.4$  cm/s,  $P < 0.001$ ; 15 cm:  $60.6 \pm 15.4$  cm/s,  $P = 0.004$ ) (Fig. 3). However, flight speed in the asymmetric condition was still significantly slower than when both walls of the tunnel were lined with horizontal stripes ( $S_{stripes}$ ) (30 cm:  $122.4 \pm 27.0$  cm/s,  $P < 0.001$ ; 15 cm:  $150.4 \pm 40.2$  cm/s,  $P < 0.001$ ) (Fig. 3). In addition, the bees flew significantly faster in the 30 cm wide tunnel than in the 15 cm wide tunnel in both the asymmetric (A) and the symmetric condition with checkerboard pattern on both walls ( $S_{checks}$ ) ( $P < 0.001$ ) (Fig. 3), but

129 this relationship was inverted when both walls were lined with the stripe pattern ( $S_{stripes}$ )  
130 ( $P=0.03$ ) (Fig. 3).

131

### 132 **The effect of abrupt unilateral changes in translational optic flow**

133 In this experiment, one wall of the tunnel displayed a checkerboard pattern while the pattern  
134 on the other wall changed from checks to stripes (creating an abrupt change from symmetric  
135 to asymmetric optic flow cues,  $S_{checks} \rightarrow A$ ), or vice versa (creating an abrupt change from  
136 asymmetric to symmetric optic flow cues,  $A \rightarrow S_{checks}$ ) halfway along the tunnel (see Fig 1B).  
137 For clarity, the experimental conditions have been abbreviated according to the combination  
138 of patterns, with  $S_{checks}$  representing checkerboard pattern on both walls,  $S_{stripes}$  representing  
139 axial stripes on both walls and  $A$  representing an asymmetric pattern combination with checks  
140 on one wall and axial stripes on the other. The first character in the abbreviation represents  
141 the pattern combination in the first half of the tunnel (with respect to a bee flying towards the  
142 feeder) and the second character represent the pattern combination in the second half. Thus,  
143 the experimental condition  $S_{checks} \rightarrow A$  indicates that the first half of the tunnel is lined with  
144 checks on both walls and the second half of the tunnel is lined with checks on one wall and  
145 axial stripes on the other wall. The experimental condition  $A \rightarrow S_{checks}$  indicates that the first  
146 half of the tunnel is lined with checks on one wall and axial stripes on the other and the  
147 second half of the tunnel is lined with checks both walls.

148 Condition  $A$  refers to the control condition, which generates an asymmetric optic flow field  
149 (checks on one wall and axial stripes on the other) along the full length of the tunnel.  
150 Condition  $S_{checks}$  refers to the control condition  $S$  generating a symmetric optic flow field  
151 (checks on both walls) along the full length of the tunnel.

152

#### 153 *Lateral position*

154 When the bees experienced an abrupt change from asymmetric to symmetric optic flow cues  
155 ( $A \rightarrow S_{checks}$ ), they responded by shifting their flight trajectories from a position that was close  
156 to the striped wall (and not significantly different from the average lateral position in the  
157 control condition,  $A$ ) to a position that was close to the tunnel's midline. In the 30 cm wide  
158 tunnel, this response occurred at an average lateral distance of 6 cm from the striped wall and  
159 at a longitudinal distance of 12 cm before the pattern change ( $P=0.02$ ; Fig. 4B). At this  
160 position, the pattern change was located at a viewing angle of 27 deg. lateral to the midline of  
161 the bee (see Fig. 1C for details of this calculation). In the 15 cm wide tunnel, the bees

162 adjusted their lateral position at a longitudinal distance of 16 cm and a lateral distance of 4 cm  
163 from the pattern change ( $P=0.04$ ; Fig. 4C), when it was located at a viewing angle of  
164 approximately 14 deg.

165

166 When the pattern on one wall instead changed from symmetric to asymmetric optic flow cues  
167 ( $S_{checks} \rightarrow A$ ), the position of the bees in the 30 cm wide tunnel did not differ significantly from  
168 the control condition ( $S_{checks}$ ) until they reached a longitudinal distance of 4 cm before the  
169 pattern change and an average lateral distance of 15 cm from the wall ( $P=0.02$ ; Fig. 4D). At  
170 this position, the pattern change was located at a viewing angle of approximately 75 deg. In  
171 the 15 cm wide tunnel, the change in lateral position did not occur until the bees reached a  
172 longitudinal distance of 2 cm *after* the pattern change at a lateral distance of 7 cm from the  
173 wall ( $P=0.002$ ; Fig. 4E). This corresponds to a viewing angle of 106 deg.

174

175 Together, these results suggest that, when bumblebees are presented with an abrupt unilateral  
176 change from axial stripes to checks, they adjust their lateral position well before they reach  
177 the change itself or, more specifically, when the change occurs at low frontal viewing angles  
178 (approximately 14-27 deg.). In contrast, when the unilateral change is from checks to axial  
179 stripes, bumblebees do not adjust their lateral position until the change occupies much larger,  
180 more lateral viewing angles (approximately 75-106 deg.).

181

### 182 *Flight speed*

183 When the translational optic flow cues changed from asymmetric to symmetric ( $A \rightarrow S_{checks}$ )  
184 the bees decreased their flight speed with respect to the control condition ( $A$ ) at a longitudinal  
185 distance of 18 cm and a lateral distance of 5 cm before the pattern change in the 30 cm wide  
186 tunnel ( $P=0.04$ ; Fig. 5A). At this position, the pattern change was located at a viewing angle  
187 of approximately 16 deg. In the 15 cm wide tunnel, flight speed decreased significantly from  
188 the control condition at a longitudinal distance of 20 cm and a lateral distance of 3 cm before  
189 the pattern change ( $P=0.02$ ; Fig. 5B). At this position, the pattern change was located at a  
190 viewing angle of approximately 9 deg.

191

192 When the translational optic flow cues changed from symmetric to asymmetric ( $S_{checks} \rightarrow A$ ),  
193 the bees increased their flight speed significantly in response to the sudden decrease in optic  
194 flow cues. In the 30 cm wide tunnel, this increase did not occur until the bees reached a

195 longitudinal distance of 22 cm *after* the pattern change, at a lateral distance of 9 cm from the  
196 wall ( $P=0.03$ ; Fig. 5C). The pattern change at this position occurs at a viewing angle of 157  
197 deg. In the 15 cm wide tunnel, the acceleration did not occur until a longitudinal distance of  
198 14 cm *after* the pattern change, and at a lateral distance of 5 cm from the wall ( $P=0.01$ ; Fig.  
199 5D), with the pattern change located at a viewing angle of 159 deg.

200

201 These results suggest that, when the unilateral optic flow cues change from weak (axial  
202 stripes) to strong (checks), condition  $A \rightarrow S_{checks}$ , bumblebees decelerate well *before* passing  
203 the change in optic flow. When the pattern instead changes from checks to axial stripes  
204 condition  $S_{checks} \rightarrow A$ , they respond by accelerating but not until *after* they have passed the  
205 pattern change.

206

207

## DISCUSSION

208

209 *Bumblebees respond to low magnitudes of translational optic flow at low viewing angles*

210 When presented with a unilateral change from axial stripes to checks ( $A \rightarrow S_{checks}$ ), the  
211 bumblebees adjusted both their position and speed when the optic flow cues subtended only a  
212 very small region of the frontal visual field. In the most extreme case, bumblebees decreased  
213 their flight speed from 53 cm/s when the pattern change occupied a viewing angle of only 9  
214 deg. (in the 15 cm tunnel). The maximum magnitude of translational optic flow that the bees  
215 would have experienced at the location of the pattern change in this case would have been  
216 approximately 24 deg./s. Considering that there is inevitably a delay between when the visual  
217 system detects a change in optic flow and when a behavioural response is initiated – this delay  
218 has been estimated at 100 ms in *Drosophila* (Fry et al., 2009) – it is likely that the bumblebees  
219 were reacting to the pattern when it generated even lower magnitudes of optic flow. Can  
220 bumblebees really detect and react to such low magnitudes of optic flow at such low viewing  
221 angles?

222

223 Behavioural evidence that bumblebees can detect and respond to low magnitudes of optic  
224 flow was first provided by Baird et al. (2010), which showed that bumblebees changed their  
225 flight speed in response to a bilateral increase in tunnel width from 15 to 30 cm when the  
226 view of the wider tunnel subtended a viewing angle of approximately 30 deg. While this is  
227 larger than the viewing angle observed in the present study, the magnitude of translational



228 optic flow experienced by bees in this case was approximately 30 deg./s, in other words, not  
229 far from the value of 24 deg./s measured in the present study. These findings are also  
230 supported by physiological evidence that motion-sensitive neurons in the bumblebee visual  
231 system respond to magnitudes of optic flow ranging from 5 deg./s to above 2000 deg./s  
232 (O'Carroll et al. 1996). Thus, the response threshold recorded in the present study lies well  
233 within the range of magnitudes that the visual system of bumblebees can detect, and provides  
234 strong behavioural evidence that the motion-sensitive mechanism underlying position and  
235 speed control is capable of detecting and responding to very low magnitudes of optic flow at  
236 low viewing angles.

237

### 238 *Bumblebees can use both unilateral and bilateral optic flow cues for speed control*

239 Bumblebees adjust their trajectories so that they fly further away from the wall that generates  
240 higher translational optic flow when presented with asymmetric optic flow cues (checks on  
241 one wall and stripes on the other, A). This is consistent with the findings of similar  
242 experiments performed on bumblebees (Baird et al., 2011; Dyhr and Higgins, 2010) and  
243 honeybees (Kirchner and Srinivasan, 1989; Srinivasan et al., 1996; Srinivasan et al., 1991). In  
244 addition, we find that bumblebees fly significantly faster when the translational optic flow is  
245 asymmetric than when the optic flow cues are strong in both eyes (checks on both walls,  
246  $S_{checks}$ ). A possible explanation for this result is that, as the bees increase the distance to the  
247 wall that provides strong optic flow cues (the checks), they experience a decrease in the  
248 apparent magnitude of optic flow generated by that wall. Since bumblebees regulate their  
249 ground speed by holding the magnitude of optic flow around a set-point (Baird et al., 2010),  
250 this change would induce a compensatory increase in flight speed provided that optic flow  
251 from one visual field provides sufficient information for speed control.

252

253 To investigate if the recorded increase in flight speed represents an attempt to hold the  
254 magnitude of translational optic flow constant in one visual field, we can estimate the  
255 maximum magnitude of optic flow experienced in the symmetric condition and compare it  
256 with that experienced when the translational optic flow cues are asymmetric. When both walls  
257 were lined with checkerboard pattern, the bees flew along the midline of the 30 cm wide  
258 tunnel at an average forward speed of 68 cm/s. The maximum magnitude of optic flow  
259 experienced by the bees in this case would be approximately 260 deg./s at a viewing angle of  
260 90 deg. When the translational optic flow was asymmetric, the bees flew at an average lateral  
261 distance of 25 cm from the checkerboard wall and increased their flight speed to 82 cm/s. In

262 this case, the maximum magnitude of translational optic flow (which occurs at a 90 deg.  
263 viewing angle) would be approximately 188 deg./s. Given that the difference in the magnitude  
264 of optic flow between these two conditions would only decrease with viewing angle – that is,  
265 the lower the viewing angle at which translational optic flow is measured, the closer these  
266 values become (at a viewing angle of 30 deg. for example, the values would be 130 and 94  
267 deg.) – and that the bees are more likely to measure optic flow for speed control at frontal  
268 rather than lateral viewing angles (discussed below), it is plausible that the increase in flight  
269 speed that we observe in the asymmetric condition is due to the increased distance that the  
270 bees are flying from the wall with the checkerboard pattern. This suggests that the bees are  
271 able to regulate their flight speed even when optic flow cues are absent from one side of the  
272 visual field.

273

274 Is this result consistent with the optic flow regulator model proposed by Serres et al. (2008a),  
275 which is currently the only comprehensive model for how translational optic flow cues may  
276 be used for speed control in flying insects? In this model, flight speed is controlled by  
277 maintaining the sum of the optic flow in the dorsal/ventral *or* lateral visual fields at a set-point  
278 – because the bees in our study changed their flight speed in response to changes in *lateral*  
279 cues, we will assume that these were the dominant cues in this experiment. According to the  
280 optic flow regulator model, the sum of the maximum magnitude of the translational optic flow  
281 experienced by the bees when flying in the tunnel with checks on both sides should be equal  
282 to that experienced in the tunnel with horizontal stripes on one wall. The sum of the  
283 maximum magnitude of optic flow in the symmetrical condition is 520 deg./s (that is,  $260 \times 2$   
284 deg./s), while it is only 188 deg./s in the asymmetrical condition (in this case, only one wall is  
285 generating translational optic flow). Thus, speed control in bumblebees does not seem to be  
286 regulated by the summation of the magnitude of translational optic flow in the lateral visual  
287 fields and is thus not fully explained by the optic flow regulator model. Instead, our results  
288 suggest that, when translational optic flow cues are absent from one side of the visual field,  
289 bumblebees control flight speed using unilateral translational optic flow cues – this is similar  
290 to honeybees, which can use unilateral optic flow cues for calculating the distance flown to a  
291 food source (Srinivasan et al., 1998). However, as soon as translational optic flow cues are  
292 detected in the other eye, information from both sides of the visual field is used for speed  
293 control.

294

295

296 *Translational optic flow for speed control is measured flexibly in the visual field*

297 Unilateral changes from axial stripes to checks ( $A \rightarrow S_{checks}$ ) caused a reduction in flight speed  
298 when they occupied low visual angles (16 deg. and 9 deg. in the 30 cm and 15 cm wide  
299 tunnels, respectively). When the unilateral translational optic flow cues changed from checks  
300 to stripes ( $S_{checks} \rightarrow A$ ), however, flight speed was adjusted only once the bees had already  
301 moved closer to the axial stripes. At this point, the checkerboard pattern on the wall with the  
302 pattern change is present only at very large viewing angles (157 deg. in the 30 cm tunnel and  
303 159 deg. in the 15 cm tunnel). Thus, in the  $A \rightarrow S_{checks}$  condition, the bees were changing their  
304 flight speed when the translational optic flow cues occupied a very narrow region of the  
305 frontal visual field, whereas in the  $S_{checks} \rightarrow A$  condition, flight speed was reduced only once  
306 the checkerboard pattern had passed 90 deg. Given the large difference in the visual angle of  
307 the pattern at the time that the bees initiated a significant change in flight speed, our results  
308 demonstrate that bumblebees are not measuring optic flow for speed control at one set  
309 viewing angle. Instead, this angle appears to be modified depending on where in the visual  
310 field translational optic flow is experienced (this hypothesis is discussed in more detail below).

311

312 *Translational optic flow for position control is measured flexibly in the visual field*

313 One model that has been proposed to explain how optic flow may be used to control lateral  
314 position in insects is the optic flow regulator model (Serres et al., 2008a). This model  
315 proposes that position is controlled by a unilateral optic flow regulator that strives to maintain  
316 the maximum magnitude of optic flow experienced in a lateral visual field about a set-point.  
317 We can explore whether this model explains our data by comparing the maximum magnitude  
318 of optic flow experienced in each lateral visual fields as the bees fly through the tunnel. This  
319 can be done by calculating the maximum magnitude of translational optic flow at 1 deg.  
320 intervals over each 180 deg. visual field and then calculating the difference between these  
321 values (Fig. 6). If this relative difference in the maximum magnitude of translational optic  
322 flow experienced in each visual field is zero then the maximum magnitude of translational  
323 optic flow is equal in both eyes, negative values indicate that it is lower in the visual field  
324 viewing the pattern change and vice versa. A prediction of the optic flow regulator model is  
325 that, when the bees adjust their position in response to the pattern change, the maximum  
326 magnitude of translational optic flow in the lateral visual field viewing the pattern change will  
327 be larger than in the lateral visual field viewing the opposite wall – in other words, if the  
328 magnitude of the optic flow on the wall with the constant check pattern was always larger

329 than on the wall with the pattern change, the bees would not need to initiate a change in  
330 position. In the case where the pattern on one wall changes from stripes to checks ( $A \rightarrow S_{checks}$ ),  
331 the bees adjust their position when the maximum optic flow experienced in the lateral visual  
332 field viewing the pattern change is 130 deg./s *higher* than the maximum optic flow generated  
333 by the opposite wall in the 30 cm wide tunnel but 88 deg./s *lower* than the maximum optic  
334 flow generated by the opposite wall in the 15 cm wide tunnel (red dotted lines, Fig. 6). In the  
335  $S_{checks} \rightarrow A$  condition, position is adjusted when the maximum optic flow on the wall with the  
336 change is 14 and 161 deg./s higher (in the 30 and 15 cm wide tunnels, respectively) than the  
337 opposite wall (blue dotted lines, Fig. 6). Thus, in two of four conditions, the maximum optic  
338 flow in the lateral visual field viewing the wall with the pattern change is less than, or very  
339 close to the optic flow experienced in the visual field viewing the opposite wall (it is  
340 important also to bear in mind that the bees would have already detected the change in optic  
341 flow when we observe a behavioural response, so that the magnitude of the optic flow when  
342 the bees detect the change would be lower). Overall, our results suggest that bumblebees do  
343 not regulate their position using only one measure of the highest magnitude of optic flow  
344 experienced in the visual field, indicating that the optic flow regulator model does not fully  
345 explain position control in bumblebees.

346

347 A second model that describes how position might be regulated using translational optic flow  
348 cues is the optic flow balancing model (Srinivasan et al., 1991). This model suggests that  
349 position is controlled by balancing the magnitude of translational optic flow in the lateral part  
350 of each visual field. The first prediction of this model, namely that position is controlled by  
351 balancing the magnitude of optic flow experienced in each eye, can be explored by comparing  
352 the maximum magnitude of optic flow experienced in each lateral visual field as the bees fly  
353 through the tunnel (Fig. 6). Our analysis shows that, when one side of the visual field  
354 experienced a large increase in the magnitude of translational optic flow, bumblebees adjusted  
355 their speed and position so as to equalise the maximum magnitude of optic flow experienced  
356 in each eye (red lines, Fig. 6). At the point when a behavioural response was observed, the  
357 maximum magnitude of translational optic flow in the visual field viewing the pattern change  
358 was located at the viewing angle occupied by the pattern change itself (speed: 9 deg. and 16  
359 deg.; position: 14 deg. and 27 deg., 15 and 30 cm wide tunnels, respectively). When there was  
360 a large decrease in the magnitude of translational optic flow, bumblebees again adjusted their  
361 speed and position so as to equalise the maximum magnitude of optic flow experienced in  
362 each eye (blue lines, Fig. 6). Once again, at the point when the behavioural responses

363 occurred, the maximum magnitude of translational optic flow in the visual field viewing the  
364 pattern change occurred at the viewing angle occupied by the pattern change (speed: 159 deg.  
365 and 157 deg.; position: 106 deg. and 75 deg., 15 and 30 cm wide tunnels, respectively) in all  
366 but one case. In this case, position in the 15 cm wide tunnel was adjusted when the pattern  
367 change subtended a viewing angle of 75 deg. (the maximum magnitude of optic flow in this  
368 case would have been experienced at 90 deg.). Overall, our results indicate that, when  
369 bumblebees experience a sudden increase or decrease in the magnitude of translational optic  
370 flow, they change both their position and speed so as to equalise this value in each eye.

371

372 It is interesting to note that we observe a difference in the timing of the speed and position  
373 changes depending on whether the magnitude of translational optic flow increases or  
374 decreases. When the magnitude of translational optic flow increased, speed and position were  
375 adjusted when the pattern change subtended similar viewing angles (speed: 9 deg. and 16  
376 deg.; position: 14 deg. and 27 deg., 15 and 30 cm wide tunnels, respectively). However, when  
377 the magnitude of optic flow decreased abruptly, bumblebees adjusted their position before  
378 they adjusted their speed. One major difference between the speed response to the abrupt  
379 increase and decrease in translational optic flow is that in the former case, the bees were  
380 responding by slowing down, whereas in the latter case, they were responding by speeding up.  
381 It is likely that the bees take longer to speed up than to slow down, which would mean that a  
382 significant difference between the test and control condition would not be observed until  
383 some time *after* the bees initiate a response. It is therefore possible that speed and position are  
384 indeed being adjusted at the same time in this condition (as they are when there is an abrupt  
385 increase in the translational optic flow cues).

386

387 The second prediction of the optic flow balancing model is that optic flow is being balanced  
388 in the lateral visual field of each eye. We can explore whether this is the case for bumblebees  
389 by investigating when they reacted to the pattern changes. When bumblebees experienced a  
390 sudden loss of translational optic flow on one side ( $S_{checks} \rightarrow A$ ), they did not modify their  
391 lateral position until the axial stripes subtended a relatively large viewing angle (75 deg. in the  
392 30 cm wide tunnel and 106 deg. in the 15 cm wide tunnel), which is consistent with the  
393 prediction of the optic flow balancing model. However, when the bumblebees experienced a  
394 change from asymmetric to symmetric optic flow cues ( $A \rightarrow S_{checks}$ ), they modified their lateral  
395 position when the translational optic flow cues subtended very small viewing angles (27 deg.  
396 in the 30 cm tunnel; 14 deg. in the 15 cm tunnel). Thus, they do not appear to be measuring

397 translational optic flow cues for position control at lateral viewing angles or even at one set  
398 angular position in each visual field. Instead of balancing the magnitude of optic flow at a  
399 large fixed viewing angle in each visual field to control position (as the optic flow balancing  
400 model suggests), bumblebees appear to be balancing the maximum magnitude of optic flow  
401 experienced in the frontal part of each visual field flexibly, that is, irrespective of whether this  
402 value occurs at the same or different visual angles in each visual field.

403

404 *Bumblebees respond primarily to translational optic flow information generated by the*  
405 *nearest obstacles*

406 Overall, the findings of this study indicate that the visual angle at which optic flow cues are  
407 being used for position and speed control varies depending on where in the visual field the  
408 highest magnitudes of translational optic flow are experienced. One potential explanation for  
409 these results is that bumblebees are selecting the translational optic flow used for flight  
410 control from one or more non-overlapping regions of the visual field. The position and size of  
411 these ‘measurement’ regions would be determined by the areas of the visual field in which the  
412 magnitude of optic flow is maximal. Such a strategy would explain how bumblebees are able  
413 to control their speed and position when translational optic flow cues are available on only  
414 one side of the visual field, as in the case of the asymmetrical tunnel. The idea that  
415 bumblebees may be extracting information about the maximum magnitude of optic flow in  
416 the visual field is consistent with the findings of a recent study showing that tethered  
417 *Drosophila* make corrective adjustments in response to the highest magnitude of optic flow  
418 encountered in the visual field (Cabrera and Theobald, 2013). Because the magnitude of optic  
419 flow increases when the distance to surfaces decreases, such a system would ensure that speed  
420 and position are being controlled relative to the nearby obstacles. This suggestion also agrees  
421 with the finding that, when presented with a three-dimensional visual environment,  
422 bumblebees control their flight according to the translational optic flow generated primarily  
423 by the nearby obstacles – that is, those that generated the highest magnitudes of translational  
424 optic flow in the visual field – rather than the optic flow generated by the background (Baird  
425 and Dacke, 2012). The fine sensitivity of the bumblebee visual system to even very low  
426 increases in the magnitude of translational optic flow at low viewing angles also suggests that  
427 optic flow information in these areas may be enhanced, resulting in a tendency to  
428 preferentially use measurements in this area for flight control. The apparent flexibility and  
429 sensitivity of the bumblebee’s optic flow measuring system would readily allow them to  
430 detect and respond to changes in the proximity of nearby obstacles. In a cluttered environment,

431 this would ensure that the bees regulate their position and speed according to the nearest  
432 obstacles, allowing them to maximise flight efficiency and to minimise the risk of collision.

433

434 It would be of interest to know the limit of the flexibility in this system, for example, how  
435 much of a visual angle would the region of translational optic flow need to subtend to have an  
436 effect on position control? It would also be of interest to know how the translational optic  
437 flow that is used for position (and speed) control is calculated in the visual system of  
438 bumblebees? Answering these questions requires more detailed investigations that will be the  
439 focus of future work.

440

441

## METHODS

442

443

### General

444 The experiments were conducted indoors in an aluminium net cage (2.1 m high, 3.2 m wide  
445 and 2.7 m long) with constant light intensity (500 lux) and temperature (20°C). A bumblebee  
446 hive, (*Bombus terrestris* L., Koppert UK) was placed in the cage at one end of a flight tunnel  
447 (3 m long horizontal floor with two parallel 30 cm high vertical walls, Fig. 1A). Individual  
448 bees (identified by small plastic number tags glued to their thorax) were trained to fly along  
449 the tunnel towards a feeder hidden in a recess at the far end. The feeder was constructed of  
450 two channels (1 cm deep and 1 cm wide) – one for sugar water and one for pollen – that ran  
451 across the width of the tunnel. The construction and recessed position of the feeder was  
452 designed to minimise the effect of the view of the feeder or its lateral position on the flight  
453 trajectories of bees flying towards it.

454

455 Two different tunnel widths (30 cm and 15 cm) were used in the experiments investigating  
456 the effect of sudden changes in translational optic flow cues on the flight control behaviour of  
457 bumblebees. By using two different tunnel widths, we could perform a more rigorous  
458 assessment of where in the visual field bees measure optic flow for position and speed control  
459 because their trajectories are differently restricted and they naturally fly faster in the wider  
460 tunnel (Baird et al., 2010).

461 For all experimental conditions, the floor of the flight tunnel was white and the top was  
462 covered with plastic insect netting. The walls of the tunnel displayed a randomised black and  
463 white 1 cm x 1 cm checkerboard pattern or 3 cm wide axial stripes (black and white). Both  
464 patterns had a Michelson contrast of 0.76 and the randomised checkerboard pattern contained



465 a broad spectrum of frequencies (for an analysis of the spatial frequencies present in the  
466 pattern, see Baird and Dacke 2012). The checkerboard pattern provided strong translational  
467 optic flow cues for bees flying along the tunnel, while the axial stripes serve to minimize  
468 translational optic flow cues. In two experimental conditions, we presented the bees with  
469 symmetric ( $S$ ) translational optic flow cues, that is, both tunnel walls displayed the same  
470 pattern that was either checks ( $S_{checks}$ ) or axial stripes ( $S_{stripes}$ ). In a third experimental  
471 condition, the bees were presented with asymmetric ( $A$ ) translational optic flow cues by  
472 placing the stripe pattern on one wall and the check pattern on the other. We also investigated  
473 the effect of abrupt changes from symmetric to asymmetric ( $S_{checks} \rightarrow A$ ) optic flow cues and  
474 vice versa ( $A \rightarrow S_{checks}$ ) on flight control by presenting the bees with different combinations of  
475 the symmetric ( $S_{checks}$ ) and asymmetric ( $A$ ) conditions in the first or second half of the tunnel.  
476 For each of the conditions in which asymmetric optic flow cues were presented, we varied the  
477 side on which the stripe pattern was presented. This allowed us to test for and subsequently  
478 exclude any side bias from these conditions. For an illustration of all experimental conditions,  
479 see Fig. 1B.

480

481

### Recording of flight trajectories

482 Bumblebees were allowed to visit the feeder at the end of the flight tunnel for at least one day  
483 before recording commenced. A camera (Mikrotron MotionBLITZ EoSens, Unterschleisheim,  
484 Germany), mounted above the centre of the tunnel, recorded flights to the feeder at 120 Hz.  
485 The experimental conditions were presented in a randomised order and the bees were given at  
486 least 30 minutes to adapt to the new experimental condition before recording commenced. A  
487 maximum of five flights were recorded for each individual in each condition. The number of  
488 flights and individuals analysed in each condition is listed in Table 2.

489

490

### Data analysis and calculations of visual field

491 In each video frame, the centre of mass of the bumblebee was determined (in x- and y- pixel  
492 coordinates) using an automated tracking program (Lindemann, 2005). The flight trajectories  
493 were analysed over a distance of 100 cm (50 cm before and 50 cm after the midsection of the  
494 tunnel). Flights in which the bees turned back towards the hive or where they crashed into the  
495 walls, the floor or the net covering the tunnel were excluded from the analysis (these flights  
496 only represented a small proportion of the total data set in any experimental condition).  
497 Lateral position data was converted from pixels to millimetres using a reference pattern  
498 placed 15 cm above the tunnel floor (the approximate height of the flight trajectories). Flight



499 speed was calculated by dividing the two-dimensional distance travelled between successive  
500 frames by the time step between frames (8.3 ms). Lateral position and flight speed data was  
501 averaged in 2 cm bins along the longitudinal axis of the tunnel (x-axis). Data from repeated  
502 flights from the same individual were averaged so that each individual was considered only  
503 once per experimental condition. To control for possible side biases, we inverted the lateral  
504 (y-axis) values in conditions 3a, 4a and 5a and compared the lateral position data with the  
505 values from the corresponding condition 3b, 4b and 5b (see Fig. 1B). In all cases, the data  
506 were indistinguishable, indicating that there was no side bias in the data set. To simplify the  
507 analysis, we therefore pooled the data together. The results from the pooled condition 4  
508 ( $S_{checks} \rightarrow A$ ) were then compared with control condition 1 ( $S_{checks}$ ) and the results from the  
509 pooled condition 5 ( $A \rightarrow S_{checks}$ ) were compared with the pooled control condition 3 (A). A  
510 response to a unilateral pattern change was considered to occur when the lateral position or  
511 flight speed in the test condition differed significantly from the data in the control condition at  
512 the corresponding longitudinal distance and continued to differ for the remainder of the  
513 analysis region. To estimate the viewing angle occupied by the pattern change when a  
514 response is observed, we took the inverse tangent of the ratio between the mean lateral  
515 distance to the wall displaying the pattern change (dy) and the mean longitudinal distance  
516 from the pattern change (dx) when the response occurred (Fig. 1C). This data was calculated  
517 using data from all individuals in the respective condition and assumed that the visual field of  
518 the bees was aligned parallel with the long axis of the tunnel. This assumption was based on  
519 the observation that the bees flew along relatively straight trajectories with their body axis  
520 aligned with the long axis of the tunnel and that the flight direction and the midline of the  
521 bee's visual field are approximately equivalent. To further support this assumption, we  
522 analysed the mean body angle for each flight over a distance of 20 cm before the first change  
523 in behaviour was observed (for the conditions with a pattern change) or in the centre of the  
524 tunnel when both walls were lined with checks (as a control). We found that the mean body  
525 angle was very low in all conditions (ranging from  $-0.4 \pm 6.8$  deg. in  $S_{checks}$  to a maximum  
526  $9.2 \pm 13.8$  deg. towards the wall with the pattern change in the  $S_{checks} \rightarrow A$ ). As a result,  
527 references to viewing angle in the text are always given with respect to the midline of the  
528 field of view (which has a viewing angle of 0 deg.). To estimate the magnitude of  
529 translational optic flow generated by the unilateral pattern change at this viewing angle  
530 (retinal angular velocity), we multiplied the sine of the viewing angle by the ratio between the  
531 velocity and the distance to the change (the hypotenuse derived from dx and dy). This

532 calculation for the maximum magnitude of optic flow performed for each degree across the  
533 region of the eye that viewed the check pattern (for the eye viewing the constant check pattern,  
534 this region was 180 deg.) at each distance step. To calculate the relative difference between  
535 the maximum magnitude of optic flow experienced in each eye (Fig. 6), we subtracted the  
536 maximum value in the eye viewing the constant pattern from the maximum value in the eye  
537 viewing the pattern that changed. Wilcoxon rank sum tests at the 5% significance level were  
538 used for all statistical analyses.

539

#### 540 **Competing interests**

541 The authors declare no competing financial interests.

542

#### 543 **Author contributions**

544 N.L., M.D, and E.B. designed the experiments. N.L. collected the data. N.L and E.B. analysed  
545 the data. N.L, M.D and E.B. wrote the manuscript.

546

#### 547 **Funding**

548 This study was funded by the Swedish Foundation for Strategic Research (FFL09-056) and  
549 Swedish Research Council (2011-4701).

## REFERENCES

- 550  
551
- 552 **Baird, E., Srinivasan, M. V., Zhang, S. W. and Cowling, A.** (2005). Visual control of  
553 flight speed in honeybees. *J. Exp. Biol.* **208**, 3895–3905.
- 554 **Baird, E. and Dacke, M.** (2012). Visual flight control in naturalistic and artificial  
555 environments. *J. Comp. Physiol. A* **198**, 869–876.
- 556 **Baird, E., Kornfeldt, T. and Dacke, M.** (2010). Minimum viewing angle for visually guided  
557 ground speed control in bumblebees. *J. Exp. Biol.* **213**, 1625–1632.
- 558 **Baird, E., Kreiss, E., Weislo, W., Warrant, E. and Dacke, M.** (2011). Nocturnal insects use  
559 optic flow for flight control. *Biol. Letters* **7**, 499–501.
- 560 **Barron, A. and Srinivasan, M. V.** (2006). Visual regulation of ground speed and headwind  
561 compensation in freely flying honey bees (*Apis mellifera* L.). *J. Exp. Biol.* **209**, 978–984.
- 562 **Cabrera, S. and Theobald, J. C.** (2013). Flying fruit flies correct for visual sideslip  
563 depending on relative speed of forward optic flow. *Front. Behav. Neurosci.* **7**, 76.
- 564 **Collett, T. S.** (2002). Insect vision: Controlling actions through optic flow. *Curr. Biol.* **12**,  
565 R615–R617.
- 566 **David, C. T.** (1982). Compensation for height in the control of groundspeed by *Drosophila* in  
567 a new, 'barber's pole' wind tunnel. *J. Comp. Physiol. A* **147**, 485–493.
- 568 **Dyhr, J. P. and Higgins, C. M.** (2010). The spatial frequency tuning of optic-flow-dependent  
569 behaviors in the bumblebee *Bombus impatiens*. *J. Exp. Biol.* **213**, 1643–1650.
- 570 **Fry, S. N., Rohrseitz, N., Straw, A. D. and Dickinson, M. H.** (2009). Visual control of  
571 flight speed in *Drosophila melanogaster*. *J. Exp. Biol.* **212**, 1120–1130.
- 572 **Gibson, J. J.** (1950). *The Perception of the Visual World*. Boston, MA: Houghton Mifflin.  
573
- 574 **Gibson, J. J.** (1979). *The Ecological Approach to Visual Perception*. Boston, MA: Houghton  
575 Mifflin.
- 576 **Kern, R., Boeddeker, N., Dittmar, L. and Egelhaaf, M.** (2012). Blowfly flight

- 577 characteristics are shaped by environmental features and controlled by optic flow  
578 information. *J. Exp. Biol.* **215**, 2501–2514.
- 579 **Kirchner, W. H. and Srinivasan, M. V.** (1989). Freely flying honeybees use image motion  
580 to estimate object distance. *Naturwissenschaften* **76**, 281–282.
- 581 **Koenderink, J. J.** (1986). Optic flow. *Vision Res.* **26**, 161–179.
- 582 **Lappe, M.** (2000). *Neuronal processing of optic flow*. San Diego, CA: Academic Press.
- 583 **Lehrer, M.** (1990). How bees use peripheral eye regions to localize a frontally positioned  
584 target. *J. Comp. Physiol. A* **167**, 173–185.
- 585 **Lindemann, J.** (2005). Visual Navigation of a Virtual Blowfly. PhD Thesis. Universität  
586 Bielefeld, Germany.
- 587 **O'Carroll, D. C., Bidwell, N. J., Laughlin, S. B. and Warrant, E. J.** (1996). Insect motion  
588 detectors matched to visual ecology. *Nature* **382**, 63–66.
- 589 **Portelli, G., Ruffier, F. and Franceschini, N.** (2010). Honeybees change their height to  
590 restore their optic flow. *J. Comp. Physiol. A* **196**, 307–313.
- 591 **Serres, J., Dray D., Ruffier, F. and Franceschini, N.** (2008a). A vision-based autopilot for  
592 a miniature air vehicle: joint speed control and lateral obstacle avoidance. *Auton Robot* **25**,  
593 103–122.
- 594 **Serres, J. R., Masson, G. P., Ruffier, F. and Franceschini, N.** (2008b). A bee in the  
595 corridor: centering and wall-following. *Naturwissenschaften* **95**, 1181–1187.
- 596 **Srinivasan, M. V., Lehrer, M., Kirchner, W. H. and Zhang, S. W.** (1991). Range  
597 perception through apparent image speed in freely flying honeybees. *Vis. Neurosci.* **6**,  
598 519–535.
- 599 **Srinivasan, M. V., Zhang, S. W., Lehrer, M.** (1998) Honeybee navigation: odometry with  
600 monocular input. *Animal behaviour.* **56**, 1245–1259.
- 601 **Srinivasan, M. V., Zhang, S. W., Lehrer, M. and Collett, T.** (1996). Honeybee navigation  
602 en route to the goal: visual flight control and odometry. *J. Exp. Biol.* **199**, 237–244.
- 603

604

605

606 **Fig. 1. Experimental set-up.** (A) Schematic diagram of a flight tunnel (300 cm long x 30 cm  
 607 wide x 30 cm high). The bumblebee hive was placed at one end of the flight tunnel (bees  
 608 could enter anywhere along the opening of the tunnel) and a two-compartment feeder (marked  
 609 in yellow), covering the whole width of the tunnel, was placed in a recess at the far end of the  
 610 tunnel. A high-speed camera recorded trajectories of bees flying over the central (100 cm)  
 611 section of the tunnel, indicated by the grey area. (B) Pattern combinations used in each  
 612 experimental condition. In two of the experimental conditions, the same type of pattern was  
 613 displayed on each wall, generating *symmetric* translational optic flow cues in the lateral visual  
 614 field of bees flying along the midline of the tunnel: 1) randomised checkerboard on both walls  
 615 (*Symmetric*, ' $S_{checks}$ ') or 2) horizontal stripes on both walls (*Symmetric stripes*, ' $S_{stripes}$ '). In the  
 616 third condition 3) one wall displayed the checkerboard pattern, while the other wall displayed  
 617 the horizontal stripe pattern: 3a) left wall: checks, right wall: stripes; or 3b) vice versa. This  
 618 presented the bees with *asymmetric* lateral optic flow cues (*Asymmetric*, ' $A$ '). In the next four  
 619 conditions, one wall displayed the checkerboard pattern along the length of the tunnel, while  
 620 the pattern on the other wall changed abruptly half way along the tunnel: 4a) left wall: checks,  
 621 right wall: checks then stripes; or 4b) vice versa; 5a) left wall: checks, right wall: stripes then  
 622 checks; or 5b) vice versa. The red arrows indicate the direction of flight. (C) Illustration of the

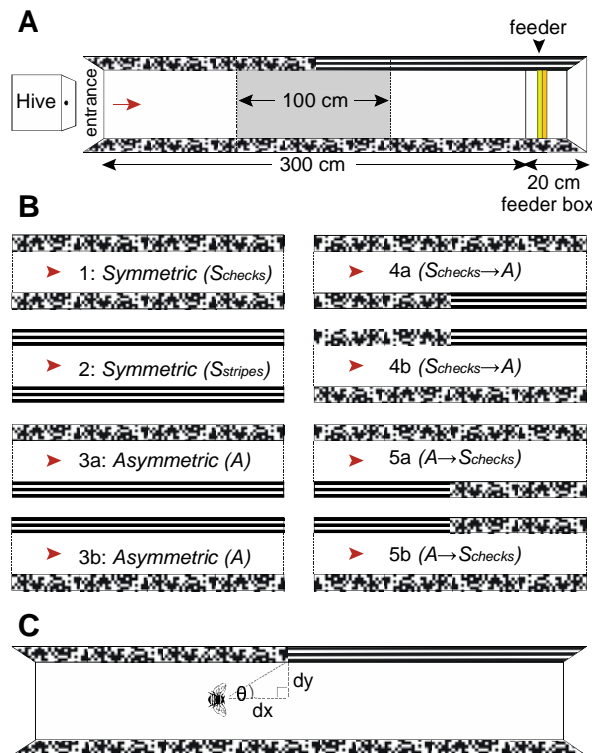

623 calculation of the viewing angle ( $\theta$ ) occupied by the unilateral pattern change when the bees  
 624 adjusted their flight speed and position in response to the abrupt change in the magnitude of  
 625 optic flow. Condition  $A \rightarrow S_{checks}$  is shown in the example.  
 626

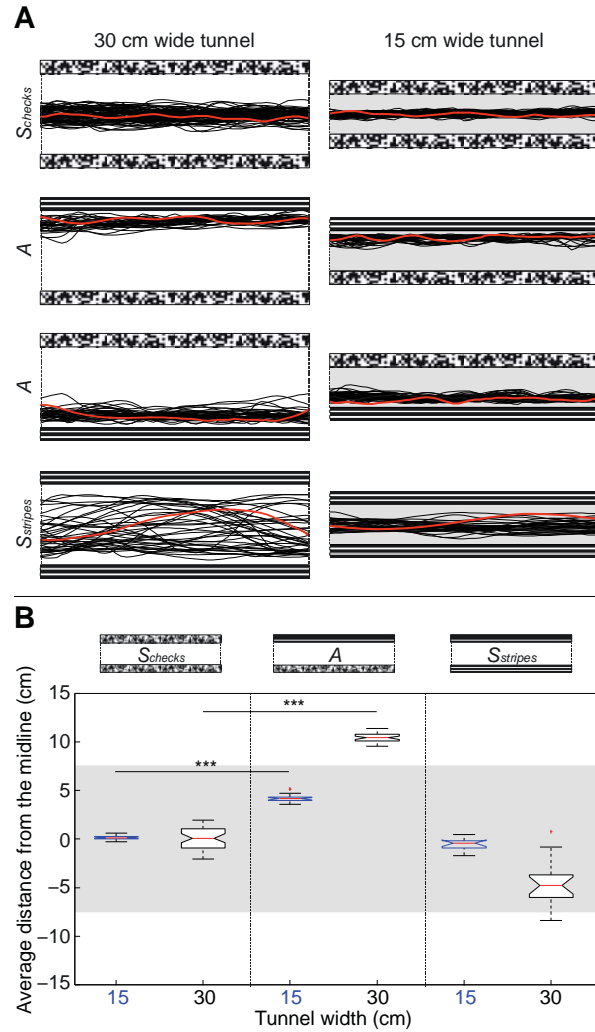

627  
 628 **Fig. 2. Effect of asymmetric translational optic flow cues on the centring response.** (A)  
 629 Raw flight trajectories for the conditions  $S_{checks}$ ,  $A$ , and  $S_{stripes}$ . A typical flight trajectory for  
 630 each condition is highlighted in red. (B) The average lateral position of bees flying in a 15 cm  
 631 (boxes outlined in blue) or 30 cm (boxes outlined in black) wide tunnel, lined with either  
 632 checks on both walls ( $S_{checks}$ ), stripes on one wall and checks on the other ( $A$ ), or stripes on  
 633 both walls ( $S_{stripes}$ ). Grey shading indicates the width of the 15 cm wide tunnel. Boxes indicate  
 634 the distance between the lower and upper quartile values, red lines indicate the median values  
 635 and whiskers indicate the entire spread of the data. Stars indicate the significance level:  
 636  $*P < 0.05$ ,  $**P < 0.01$ ,  $***P < 0.001$ .

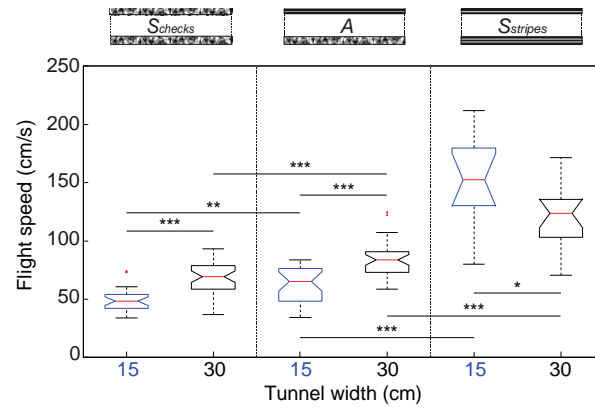

638

639

640 **Fig. 3. Effect of asymmetric translational optic flow cues on speed control.** Average flight  
 641 speed of bees flying in a 15 cm (boxes outlined in blue) or 30 cm (boxes outlined in black)  
 642 wide tunnel, lined with either checks on both walls ( $S_{checks}$ ), stripes on one wall and checks on  
 643 the other ( $A$ ), or stripes on both walls ( $S_{stripes}$ ). Boxes indicate the distance between the lower  
 644 and upper quartile values, red lines indicate the median values and whiskers indicate the  
 645 entire spread of the data. Stars indicate the level of significance:  $*P < 0.05$ ,  $**P < 0.01$ ,  
 646  $***P < 0.001$ .

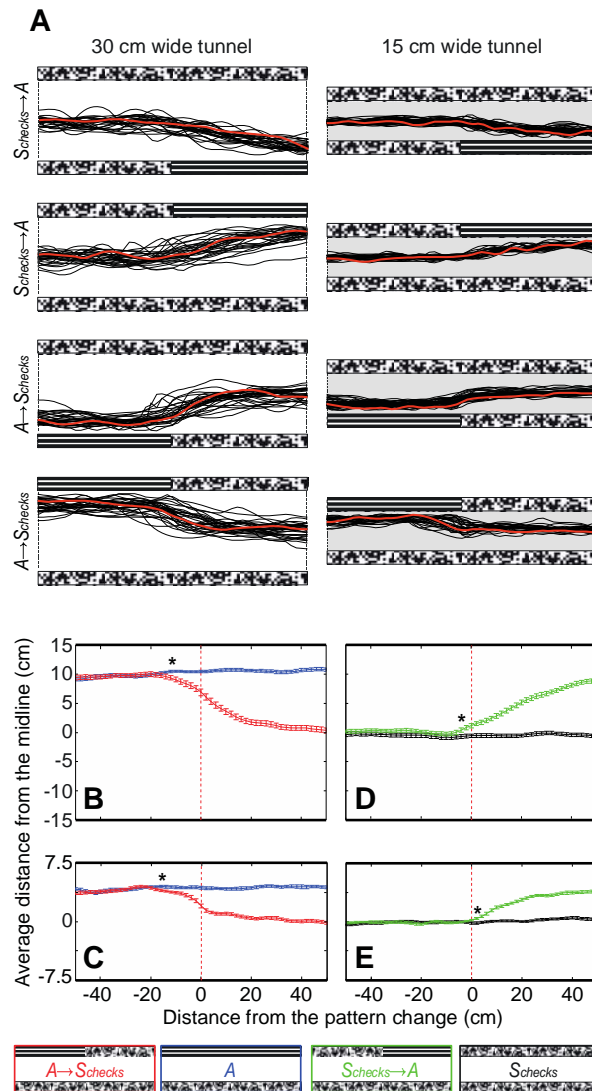

647

648

649 **Fig. 4. Effect of a unilateral change in optic flow on lateral position.** (A) Raw flight  
 650 trajectories for the conditions  $S_{checks} \rightarrow A$  and  $A \rightarrow S_{checks}$ . A typical flight trajectory for each  
 651 condition is highlighted in red. Grey shading indicates the width of the 15 cm wide tunnel.  
 652 Average lateral position of bees flying along a 30 cm wide tunnel (B, D) or a 15 cm wide  
 653 tunnel (C, E). Red lines represent condition  $A \rightarrow S_{checks}$ , blue lines represent control condition A,  
 654 green lines represents condition  $S_{checks} \rightarrow A$  and black lines represent control condition  $S_{checks}$ .  
 655 The red dotted line illustrates the point in the tunnel where the unilateral pattern change  
 656 occurred, generating an asymmetric change in the magnitude of translational optic flow. Means  
 657 are calculated over 2 cm bins, error bars represent the standard error of the mean. Asterisks  
 658 indicate where the lateral position of the bees in condition  $A \rightarrow S_{checks}$  or  $S_{checks} \rightarrow A$  deviates



659 significantly from the lateral position in the corresponding control condition ( $A$  or  $S_{checks}$ ,  
 660 respectively).  
 661

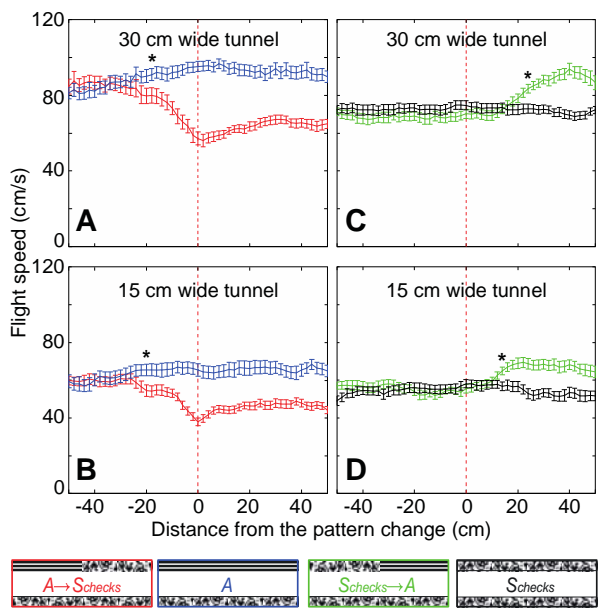

662  
 663  
 664 **Fig. 5. Effect of a unilateral change in optic flow on flight speed.** Average flight speed of  
 665 bees flying along a 30 cm wide tunnel (A, C) or a 15 cm wide tunnel (B, D). Red lines  
 666 represent condition  $A \rightarrow S_{checks}$ , blue lines represent control condition  $A$ , green lines represents  
 667 condition  $S_{checks} \rightarrow A$  and black lines represent control condition  $S_{checks}$ . The red dotted line  
 668 illustrates the point in the tunnel where the unilateral pattern change occurred, generating a  
 669 asymmetric change in the magnitude of translational optic flow. Means are calculated over 2  
 670 cm bins, error bars represent the standard error of the mean. Asterisks indicate where the  
 671 flight speed in condition  $A \rightarrow S_{checks}$  or  $S_{checks} \rightarrow A$  deviates significantly from the flight speed in  
 672 the corresponding control condition ( $A$  or  $S_{checks}$ , respectively).  
 673  
 674  
 675

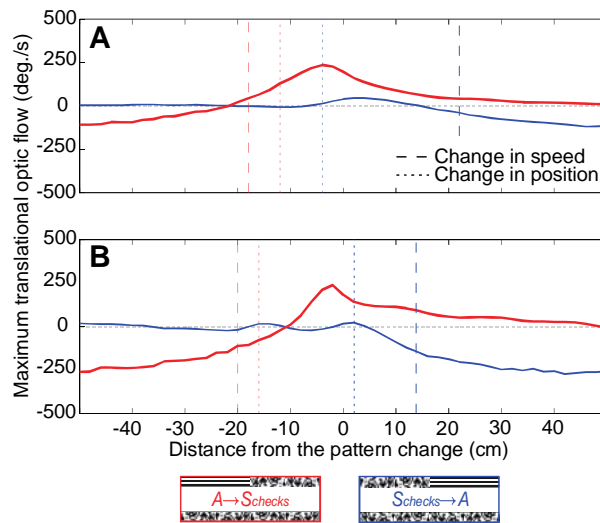

677

678

679 **Fig. 6. Comparison of the maximum magnitude of translational optic flow in each visual**  
 680 **field.** The maximum magnitude of optic flow over 180 deg. was calculated for the visual field  
 681 viewing the pattern change and compared with the visual field viewing the constant pattern  
 682 for the two conditions,  $A \rightarrow S_{checks}$  (solid red lines) or  $S_{checks} \rightarrow A$  (solid blue lines) in both the 30  
 683 cm (A) and 15 cm (B) wide tunnels. A value of zero indicates that the maximum magnitude of  
 684 translational optic flow is equal in each visual field, a negative value indicates that it is lower  
 685 in the visual field viewing the pattern change and vice versa. Note that the calculation for the  
 686 visual field viewing the pattern change was made only for the region occupied by the check  
 687 pattern as the stripe pattern generated no translational optic flow cues. Vertical lines indicate  
 688 the longitudinal distance from the pattern change at which a change in speed (dashed lines) or  
 689 position (dotted lines) was recorded for each condition (red lines indicate the data for the  
 690  $A \rightarrow S_{checks}$  condition and blue lines for the  $S_{checks} \rightarrow A$  condition).

691 **Table 1. Details of statistical analysis.** Wilcoxon rank sum tests at a 5% significance level  
 692 were used for all statistical analyses. N is the total number of flights included in the analysis.  
 693 For illustrations of the different experimental conditions ( $S_{checks}$ , A,  $S_{stripes}$ ,  $S_{checks} \rightarrow A$ ,  
 694  $A \rightarrow S_{checks}$ ) see Fig. 1B.  
 695

| $S_{checks} \rightarrow A$ vs. $S_{checks}$ |                            | $A \rightarrow S_{checks}$ vs. A |                            | $S_{checks}$ vs. A         |                            | A vs. $S_{stripes}$        | 15 cm vs. 30 cm           |                                           |                                            |
|---------------------------------------------|----------------------------|----------------------------------|----------------------------|----------------------------|----------------------------|----------------------------|---------------------------|-------------------------------------------|--------------------------------------------|
|                                             | position                   | speed                            | position                   | speed                      | position                   | speed                      | speed                     | speed                                     |                                            |
| 15 cm                                       | Z=3.04<br>N=49<br>P=0.002  | Z=2.53<br>N=49<br>P=0.011        | Z=2.05<br>N=64<br>P=0.040  | Z=2.27<br>N=64<br>P=0.023  | Z=-6.29<br>N=54<br>P<0.001 | Z=-2.85<br>N=54<br>P=0.004 | Z=4.86<br>N=40<br>P<0.001 | $S_{checks}$<br>Z=-5.0<br>N=67<br>P<0.001 | $S_{stripes}$<br>Z=2.15<br>N=29<br>P=0.032 |
|                                             | Z=-2.32<br>N=82<br>P=0.020 | Z=-2.17<br>N=82<br>P=0.030       | Z=-2.39<br>N=70<br>P=0.017 | Z=-2.03<br>N=70<br>P=0.042 | Z=7.69<br>N=80<br>P<0.001  | Z=4.35<br>N=80<br>P<0.001  | Z=4.44<br>N=56<br>P<0.001 | A<br>Z=-4.81<br>N=67<br>P<0.001           |                                            |

696  
 697  
 698  
 699  
 700

**Table 2. Sample size for each condition.** See Fig. 1B for illustration and description of the pattern combinations used for all conditions.

| Condition                           | Number of individuals<br>(15 cm / 30 cm tunnel) | Number of flights<br>(15 cm / 30 cm tunnel) |
|-------------------------------------|-------------------------------------------------|---------------------------------------------|
| 1 ( $S_{checks}$ )                  | 26/41                                           | 66/75                                       |
| 2 ( $S_{stripes}$ )                 | 12/17                                           | 34/41                                       |
| 3a;b (A)                            | 14/23; 14/16                                    | 48/38; 30/30                                |
| 4a;b ( $S_{checks} \rightarrow A$ ) | 12/21; 11/20                                    | 42/27; 25/30                                |
| 5a;b ( $A \rightarrow S_{checks}$ ) | 21/13; 15/18                                    | 41/29; 27/32                                |

701  
 702

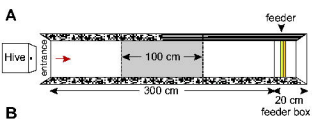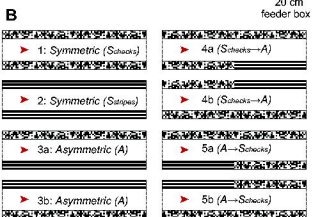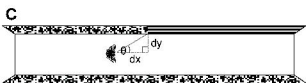

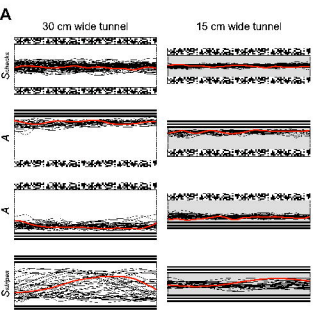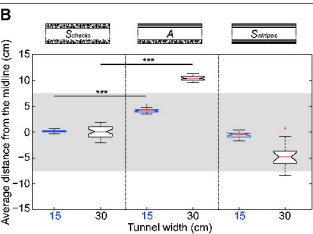

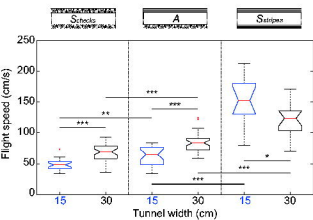

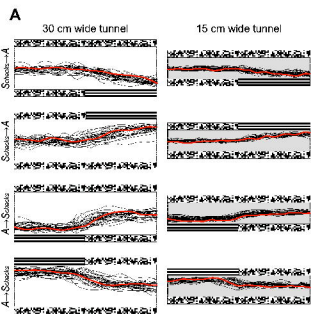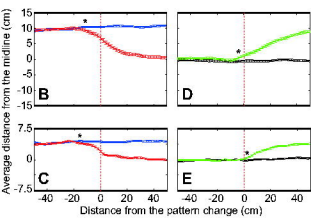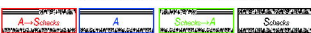

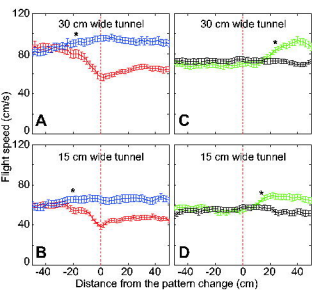



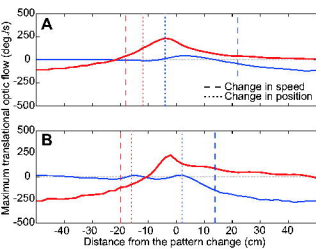

Source: https://cob.silverchair.com/jeb/article-pdf/doi/10.1242/jeb.107409/2037952/jeb_107409.pdf
